# Supplementary material for: Recommended procedures for the management of early childhood caries lesions – a scoping review by the Children Experiencing Dental Anxiety: Collaboration on Research and Education (CEDACORE)
Source: Springer Nature journal article supplement (doi:10.1186/s12903-020-01067-w), 2020-03-17
Supplement: MOESM2 [file 17807808]

Additional File 2. Characteristics of replaced studies and recommended procedures for ECC management

| <b>Author, year</b>      | <b>Country and/or association</b>                        | <b>Recommended procedures for management</b>                                                                                                                                                                                                                                                                                                                                                                                                                                                                                                                                                                 |
|--------------------------|----------------------------------------------------------|--------------------------------------------------------------------------------------------------------------------------------------------------------------------------------------------------------------------------------------------------------------------------------------------------------------------------------------------------------------------------------------------------------------------------------------------------------------------------------------------------------------------------------------------------------------------------------------------------------------|
| <b>Policies</b>          |                                                          |                                                                                                                                                                                                                                                                                                                                                                                                                                                                                                                                                                                                              |
| Rayner et al., 2003 [21] | British Society of Paediatric Dentistry (United Kingdom) | Interim therapeutic restorations<br>Permanent restorations<br>Prosthetic restoration<br>Extraction<br>* Treatment under general anesthesia should be considered.                                                                                                                                                                                                                                                                                                                                                                                                                                             |
| Fayle et al., 2001 [22]  | British Society of Paediatric Dentistry (United Kingdom) | Active dental caries: <ul style="list-style-type: none"> <li>- preventive strategies (water fluoridation, fluoride in toothpaste and supplements, dietary counseling, fissure sealants, oral hygiene instruction, professional topical application of fluoride) alone are rarely adequate;</li> <li>- restorations with amalgam, composite resins, compomers or glass ionomer cements for one or two surface restorations, or stainless-steel crowns for extensive and/or multi-surface caries;</li> <li>- pulp treatment, if necessary;</li> <li>- extraction under local or general anesthesia.</li> </ul> |

|                                                               |                                                         |                                                                                                                                                                                                                                                                       |
|---------------------------------------------------------------|---------------------------------------------------------|-----------------------------------------------------------------------------------------------------------------------------------------------------------------------------------------------------------------------------------------------------------------------|
|                                                               |                                                         | * Oral or inhalation conscious sedation can be used as an essential adjunct. General anesthesia can be indicated in cases of multiple extractions and/or restorations in young or anxious children.                                                                   |
| American Academy of Pediatric Dentistry, 2008b [24]           | American Academy of Pediatric Dentistry (United States) | Anticariogenic agents (not specified)<br>ITR<br>Stainless-steel crowns<br>* To perform treatment effectively and efficiently, the practitioner often must use advanced behavior guidance techniques (protective stabilization and/or sedation or general anesthesia). |
| <b>Guidelines</b>                                             |                                                         |                                                                                                                                                                                                                                                                       |
| Ministerio de Salud, Gobierno de Chile, 2008 [38]             | Ministerio de Salud, Gobierno de Chile (Chile)          | Application of fluorides (varnish, gel, mouthwash, fluoridated toothpaste)<br>Sealants for non-cavitated lesions<br>Dentin lesions: ART, restoration with resin or glass ionomer cement, preformed crowns.<br>Pulpal therapy                                          |
| American Academy of Pediatric Dentistry, 2008a [30] (replaced | American Academy of Pediatric Dentistry (United States) | Sealants for incipient lesions<br>ITR<br>ART<br>Restoration with glass ionomer cement or resin-based composites or amalgam                                                                                                                                            |

|                                                                                     |                                                         |                                                                                                                                                                                                                                                                                                                                                                                                                                                                                                  |
|-------------------------------------------------------------------------------------|---------------------------------------------------------|--------------------------------------------------------------------------------------------------------------------------------------------------------------------------------------------------------------------------------------------------------------------------------------------------------------------------------------------------------------------------------------------------------------------------------------------------------------------------------------------------|
| AAPD, 2004<br>[31])                                                                 |                                                         | Stainless-steel crowns<br><br>Fixed prosthetic restoration<br><br>Removable prosthetic appliances                                                                                                                                                                                                                                                                                                                                                                                                |
| American Academy of Pediatric Dentistry, 2004<br>[31]                               | American Academy of Pediatric Dentistry (United States) | Sealants for incipient lesions<br><br>ITR<br><br>ART<br><br>Restoration with glass ionomer cement or resin-based composites or amalgam<br><br>Stainless-steel crowns<br><br>Fixed prosthetic restoration<br><br>Removable prosthetic appliances                                                                                                                                                                                                                                                  |
| American Academy of Pediatric Dentistry, 2013<br>[33] (replaced AAPD, 2010<br>[34]) | American Academy of Pediatric Dentistry (United States) | One to two years old: restore cavitated lesions with ITR or definitive restorations; active surveillance for incipient lesions<br><br>> Three years: restoration of cavitated or enlarging lesions; incipient lesions: active surveillance, except for children with high risk and parent not engaged, in which cases incipient lesions should be restored.<br><br>* Fluoridated toothpaste was recommended for all children, except for those less than two years old with low risk for caries. |

|                                                                |                                                                |                                                                                                                                                                                                                                                                                                                                                                                                                                        |
|----------------------------------------------------------------|----------------------------------------------------------------|----------------------------------------------------------------------------------------------------------------------------------------------------------------------------------------------------------------------------------------------------------------------------------------------------------------------------------------------------------------------------------------------------------------------------------------|
| <p>American Academy of Pediatric Dentistry, 2010 [34]</p>      | <p>American Academy of Pediatric Dentistry (United States)</p> | <p>One to two years old: restore cavitated lesions with ITR or definitive restorations; active surveillance for incipient lesions</p> <p>&gt; Three years: restoration of cavitated or enlarging lesions; incipient lesions: active surveillance, except for children with high risk and parent not engaged, in which cases incipient lesions should be restored</p> <p>* Fluoridated toothpaste was recommended for all children.</p> |
| <p>Brazilian Association of Pediatric Dentistry, 2009 [35]</p> | <p>Brazilian Association of Pediatric Dentistry (Brazil)</p>   | <p>Sealants for incipient lesions</p> <p>ART</p> <p>Restoration with resin, glass ionomer cement, amalgam, or stainless-steel crowns</p>                                                                                                                                                                                                                                                                                               |
